# Supplementary material
Source: PubMed Central journal article supplement (PMC5303029)
Supplement: SD3.pdf [file SD3.pdf]

SUPPLEMENTAL TABLE 1

Antigen, cutoff, median, and range of IgG responses (MFI-bg) to each antigen for Malian schoolchildren

| Antigen                                          | Cutoff (MFI-bg) | Median (range) of fluorescence intensities (MFI-bg)* |
|--------------------------------------------------|-----------------|------------------------------------------------------|
| MSP-1 <sub>42</sub>                              | 312             | 23,920 (13 to 32,661)                                |
| AMA-1                                            | 237             | 28,589 (17 to 32,648)                                |
| <i>Plasmodium vivax</i> MSP-1 <sub>19</sub> /GST | 393             | 172 (17 to 29,986)                                   |
| GST                                              | –               | 102 (–2 to 929)                                      |

AMA-1 = apical membrane antigen; GST = glutathione-S-transferase; MFI-bg = median fluorescence intensity with background subtracted; MSP-1 = merozoite surface protein.  
\*Possible MFI range is 1 to 32,766 without background (bg) subtracted, and MFI-bg can be a negative number.
